# Supplementary material for: Mycobacterial HelD is a nucleic acids-clearing factor for RNA polymerase
Source: PubMed Central journal article supplement (PMC7749160; doi:10.1038/s41467-020-20158-4), 2020-12-18
Supplement: 41467_2020_20158_MOESM3_ESM.pdf [file 41467_2020_20158_MOESM3_ESM.pdf]

## Description of Additional Supplementary Files

**Supplementary Movie 1:** Cryo-EM structure of the *Msm* HeID-RNAP complex in State I – PCh-engaged. The movie shows LocScale filtered cryo-EM map of State I in two perpendicular rotations. The individual RNAP parts and HeID domains are labelled and color-coded as in Fig. 1.

**Supplementary Movie 2:** Cryo-EM structure of the *Msm* HeID-RNAP complex in State II – PCh-engaged and AS-interfering. The movie shows LocScale filtered cryo-EM map of State II in two perpendicular rotations. The individual RNAP parts and HeID domains are labelled and color-coded as in Fig. 1.

**Supplementary Movie 3:** Cryo-EM structure of the *Msm* HeID-RNAP complex in State III – PCh dis-engaged and AS-interfering. The movie shows LocScale filtered cryo-EM map of State III in two perpendicular rotations. The individual RNAP parts and HeID domains are labelled and color-coded as in Fig. 1.
